# Supplementary material for: Modifiable Predictors of Dementia in Mild Cognitive Impairment: A Systematic Review and Meta-Analysis
Source: Atypon-hosted journal article supplement (doi:10.1176/appi.ajp.2014.14070878), 2015-02-20
Supplement: appi.ajp.2014.14070878.ds001.pdf [file appi.ajp.2014.14070878.ds001.pdf]

 


Psychiatry Online
