# Supplementary material for: Modifiable Predictors of Dementia in Mild Cognitive Impairment: A Systematic Review and Meta-Analysis
Source: Atypon-hosted journal article supplement (doi:10.1176/appi.ajp.2014.14070878), 2015-02-20
Supplement: appi.ajp.2014.14070878.ds001.pdf [file appi.ajp.2014.14070878.ds001.pdf]

**Figure 1: PRISMA Flow Diagram**

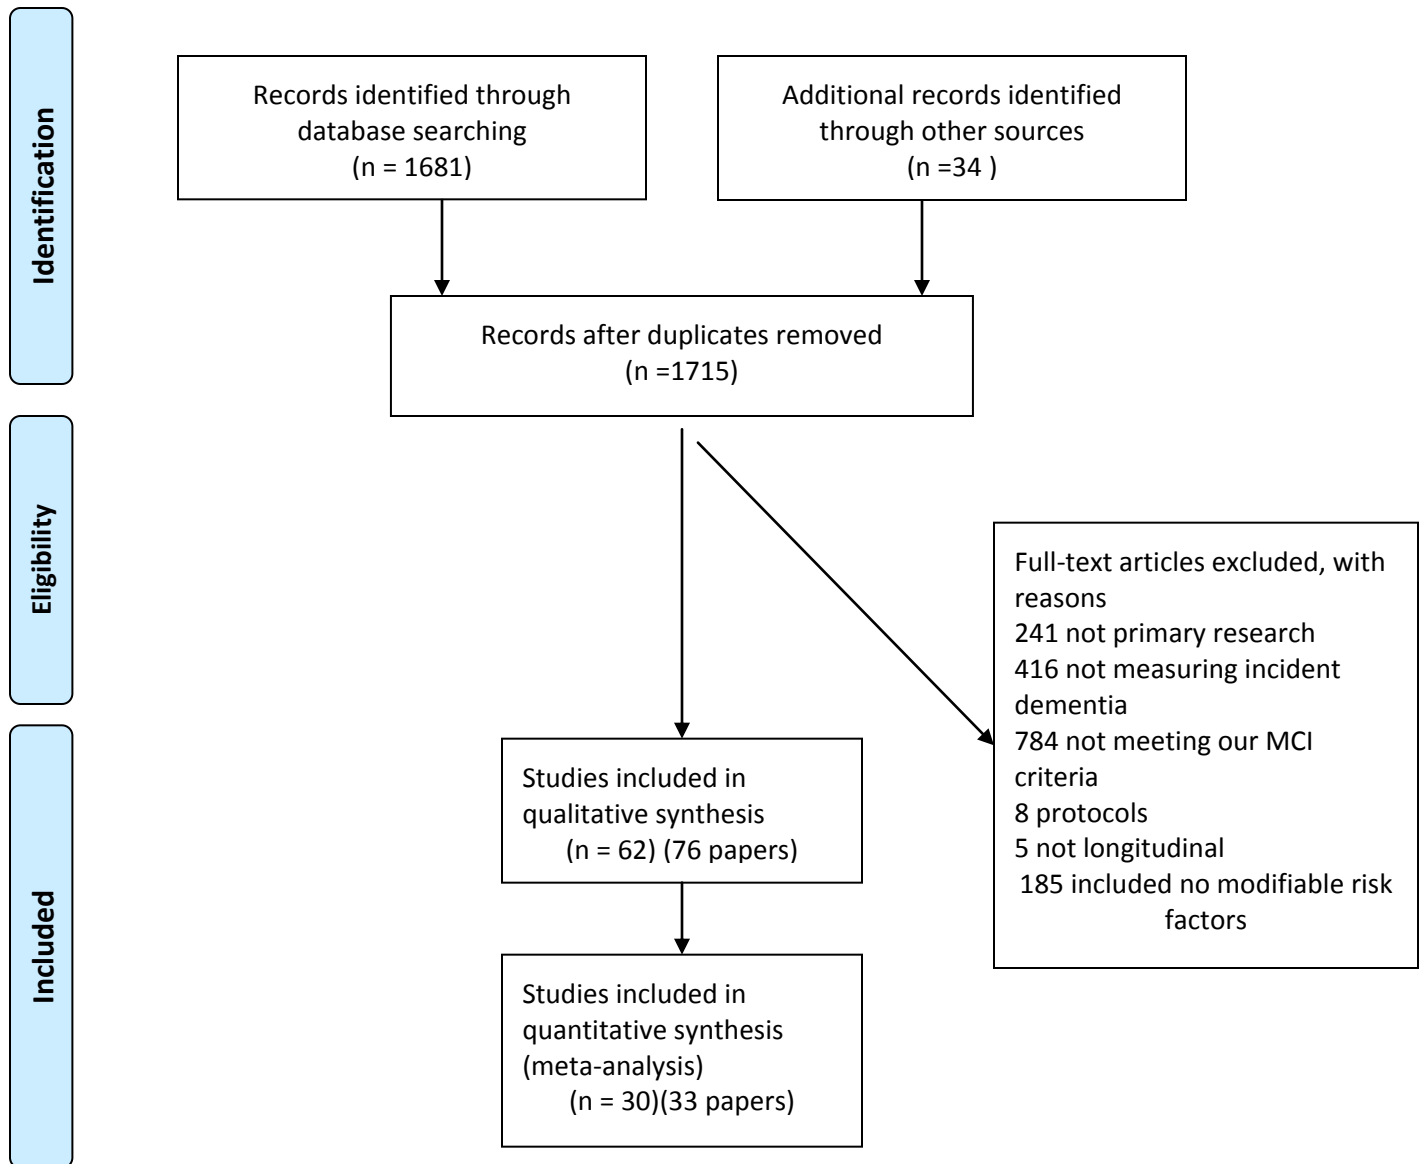

From: Moher D, Liberati A, Tetzlaff J, Altman DG, The PRISMA Group (2009). Preferred Reporting Items for Systematic Reviews and Meta-Analyses: The PRISMA Statement. PLoS Med 6(6): e1000097. doi:10.1371/journal.pmed1000097

For more information, visit [www.prisma-statement.org](http://www.prisma-statement.org).

## Supplemental Tables

### Key for all tables

Unless stated, dementia diagnoses met DSM-IV (or DSM-III-R) criteria for dementia, or NINCDS/ARDR criteria for possible or probable AD, or NINDS-AIREN criteria for possible or probable vascular dementia, or DLB Consortium criteria for Lewy body disease or Manchester-Lund criteria for frontotemporal dementia.

\*MCI criteria for diagnosis – in addition to objective cognitive (or for aMCI) impairment on testing; absence of dementia and ADL impairment

\*\* Whether meets validity criteria in method: 1. A defined representative sample of participants assembled at a common (usually early) point in the course of their disease, or recruited to be representative of the general older population, with a response rate of at least 60% of eligible potential participants. 2. Participant follow-up for at least a year, with at least 70% followed up. 3. Criteria for diagnosing MCI and dementia were objective or applied in a 'masked' fashion.

AB=abstinence; AD=Alzheimer's Disease; ADASCog=Alzheimer's Disease Assessment Scale-cognitive subscale; ADL=Activities of Daily Living; aMCI=Amnesic Mild Cognitive Impairment; APOE=Apolipoprotein E; b/l=baseline; BMI=Body Mass Index; bp=Blood Pressure; CDR=Clinical Dementia Rating scale; CERAD=Consortium to Establish a Registry for Alzheimer's Disease; CAD=coronary artery disease; ChEI=Cholinesterase Inhibitor; C/NC: Converters (to Dementia) versus Non-Converters; CPH=Cox Proportional Hazards; CSF=Cerebrospinal Fluid; CIRS=Cumulative Illness Rating Scale; CVA=Cerebrovascular Accident; DM=Diabetes Mellitus; FHx=Family History of Dementia; GDS=Geriatric Depression Scale; GLM=Generalized Linear Model; HD=Heart disease; HDL=High Density Lipoprotein; HR=Hazard Ratio; HRT=Hormone replacement Therapy; HT=Hypertension; IADL=Instrumental Activities of Daily Living; IQ=Intelligence Quotient; IWG=International Working Group; KM=Kaplan-Meier analysis; LDL=Low Density Lipoprotein; LEDS=Life events and Difficulties Schedule; LR=Logistic Regression; MCI=Mild Cognitive Impairment; MMSE=Mini Mental State Examination; MADRS=Montgomery-Åsberg Depression Rating Scale; MD-MCI=Multi domain MCI; MeDi=Mediterranean Diet; MPS=Mild Parkinsonian Symptoms; N=number; NINCDS=National Institute of Neurological and Communicative Disorders and Stroke; NP=Neuropsychological test score; NPI=Neuropsychiatric Inventory; NS=Non Significant; OR=Odds Ratio; (P)=Petersen criteria; CT=Randomized Controlled Trial; RR=Risk or Rate Ratio; SD=Standard Deviation; SMC=Subjective memory impairment; S/IMC=Subjective or informant base memory impairment; SCC=Subjective cognitive complaint; S/ICC=Subjective or informant-based cognitive complaint; T1/T2=Time 1 and Time 2; TIA=Transient Ischemic Attack; UC: Univariate comparisons; VaD=Vascular Dementia; WMS-R=Wechsler Memory Scale-Revised; WS=Figure shows response or follow-up rate for whole cohort, not specifically those with MCI

**TABLE S1. Characteristics and findings of higher quality epidemiological studies**

| Study                     | Recruitment source                                                                                            | % recruited | FU, years | MCI subtypes and criteria* | N (outcome if not dementia) | % follow-up | Analysis adjusted for..                                                                   | Model | Prognostic factor                                  | Statistics (for all MCI unless stated) |
|---------------------------|---------------------------------------------------------------------------------------------------------------|-------------|-----------|----------------------------|-----------------------------|-------------|-------------------------------------------------------------------------------------------|-------|----------------------------------------------------|----------------------------------------|
| Han (73)                  | Random sampling in Seongnam, Korea                                                                            | 64%         | 1.5       | All<br>IWG criteria        | 140                         | 71%         | age, sex, education, time, APOE, medications,MMSE, GDS, CIRS                              | LR    | Years education, chronic illness, GDS, medications | All ns (stats not given)               |
| Li (18)                   | Long term residents aged 55+without depression from 10 randomly selected communities in the city of Chongqing | 71%         | 5         | aMCI<br>SMC                | 638 (AD)                    | 76%         | age, sex, education, occupation, depressive symptoms, APOE4, baseline MMSE, and ADL score | CPH   | Hypertension                                       | HR 1.84(1.19–2.84) p=0.006             |
|                           |                                                                                                               |             |           |                            |                             |             |                                                                                           |       | Diabetes                                           | HR 1.62 (1.00–2.62) p=0.049            |
|                           |                                                                                                               |             |           |                            |                             |             |                                                                                           |       | Hypercholesterolemia (HC)                          | HR 1.11 (1.04–1.18), p=0.001           |
|                           |                                                                                                               |             |           |                            |                             |             |                                                                                           |       | Obesity                                            | HR 1.15 (0.45–2.92) p=0.78             |
|                           |                                                                                                               |             |           |                            |                             |             |                                                                                           |       | Myocardial infarction                              | HR 1.05 (0.67–1.65) p=0.83             |
|                           |                                                                                                               |             |           |                            |                             |             |                                                                                           |       | Atrial fibrillation                                | HR 1.09 (0.54–2.20) p=0.815            |
|                           |                                                                                                               |             |           |                            |                             |             |                                                                                           |       | Current smoking                                    | HR 1.09 (0.67–1.79) p=0.73             |
|                           |                                                                                                               |             |           |                            |                             |             |                                                                                           |       | Daily drinking                                     | HR 1.10 (0.69–1.75) p=0.700            |
|                           |                                                                                                               |             |           |                            |                             |             |                                                                                           |       | Vs untreated: HT treated                           | HR 0.85 (0.80–0.90) p=0.001            |
|                           |                                                                                                               |             |           |                            |                             |             |                                                                                           |       | Diabetes treated                                   | HR 0.87 (0.83–0.91) p=0.001            |
|                           |                                                                                                               |             |           |                            |                             |             |                                                                                           |       | HC treated                                         | HR 0.88 (0.83–0.93) p=0.001            |
|                           |                                                                                                               |             |           |                            |                             |             |                                                                                           |       | Cease smoking                                      | HR 0.91 (0.49–1.70) p=0.78             |
|                           |                                                                                                               |             |           |                            |                             |             |                                                                                           |       | Cease drinking                                     | HR 0.89 (0.62–1.27) p=0.51             |
| Luck (25)                 | A random sample selected from people aged 75+in 6 German towns referred by General Practitioners              | 75%         | 4.5       | All                        | 745                         | 71%         | Age, gender, cognition and other factors listed                                           | CPH   | Living alone                                       | HR 1.42 (0.95–2.14) 0.09               |
|                           |                                                                                                               |             |           |                            |                             |             |                                                                                           |       | Not married currently                              | HR 1.52 (0.71–3.23)                    |
|                           |                                                                                                               |             |           |                            |                             |             |                                                                                           |       | Diabetes Mellitus                                  | HR 1.35 (0.94–1.96) 0.11               |
|                           |                                                                                                               |             |           |                            |                             |             |                                                                                           |       | Hypertension                                       | HR 1.05 (0.70–1.59) 0.81               |
|                           |                                                                                                               |             |           |                            |                             |             |                                                                                           |       | Cardiac arrhythmia                                 | HR 0.80 (0.53–1.21) 0.30               |
|                           |                                                                                                               |             |           |                            |                             |             |                                                                                           |       | Coronary heart disease                             | HR 1.25 (0.82–1.90) 0.29               |
|                           |                                                                                                               |             |           |                            |                             |             |                                                                                           |       | Myocardial infarction                              | HR 0.59 (0.31–1.15) 0.12               |
|                           |                                                                                                               |             |           |                            |                             |             |                                                                                           |       | Peripheral artery disease                          | HR 0.95 (0.53–1.69) 0.85               |
|                           |                                                                                                               |             |           |                            |                             |             |                                                                                           |       | Carotid artery stenosis                            | HR 0.61 (0.21–1.79) 0.37               |
|                           |                                                                                                               |             |           |                            |                             |             |                                                                                           |       | TIA                                                | HR 1.55 (0.91–2.64) 0.10               |
|                           |                                                                                                               |             |           |                            |                             |             |                                                                                           |       | Hyperlipidemia                                     | HR 1.27 (0.82–1.95) 0.29               |
|                           |                                                                                                               |             |           |                            |                             |             |                                                                                           |       | Hypercholesterolemia                               | HR 1.16 (0.76–1.78) 0.48               |
|                           |                                                                                                               |             |           |                            |                             |             |                                                                                           |       | Epilepsy                                           | HR 0.14 (0.02–1.12) 0.06               |
|                           |                                                                                                               |             |           |                            |                             |             |                                                                                           |       | Hyperthyroidism                                    | HR 0.94 (0.45–1.96) 0.87               |
|                           |                                                                                                               |             |           |                            |                             |             |                                                                                           |       | Hypothyroidism                                     | HR 0.88 (0.34–2.32) 0.80               |
|                           |                                                                                                               |             |           |                            |                             |             |                                                                                           |       | GDS 6+                                             | HR 1.60 (1.03–2.48) 0.04               |
|                           |                                                                                                               |             |           |                            |                             |             |                                                                                           |       | Impaired vision                                    | HR 1.02 (0.65–1.58) 0.95               |
|                           |                                                                                                               |             |           |                            |                             |             |                                                                                           |       | Impaired hearing                                   | HR 1.44 (1.01–2.05) 0.05               |
| Former versus nonsmoker   | HR 0.69 (0.45–1.08) 0.10                                                                                      |             |           |                            |                             |             |                                                                                           |       |                                                    |                                        |
| Current versus nonsmoker  | HR 0.94 (0.47–1.87) 0.86                                                                                      |             |           |                            |                             |             |                                                                                           |       |                                                    |                                        |
| Normal versus no drinking | HR 1.13 (0.78–1.65) 0.51                                                                                      |             |           |                            |                             |             |                                                                                           |       |                                                    |                                        |
| Harmful versus no         | HR 0.47 (0.06–3.59) 0.46                                                                                      |             |           |                            |                             |             |                                                                                           |       |                                                    |                                        |

|                |                                                                                                                                                 |       |     |                                     |          |                                                                                 |                                                                    |                               |                                               |                                                                    |
|----------------|-------------------------------------------------------------------------------------------------------------------------------------------------|-------|-----|-------------------------------------|----------|---------------------------------------------------------------------------------|--------------------------------------------------------------------|-------------------------------|-----------------------------------------------|--------------------------------------------------------------------|
|                |                                                                                                                                                 |       |     |                                     |          |                                                                                 |                                                                    |                               | drinking                                      |                                                                    |
|                |                                                                                                                                                 |       |     |                                     |          |                                                                                 |                                                                    |                               | Antidementia drugs                            | HR 1.19 (0.78–1.84) 0.42                                           |
| Peltz (78)     | Members of a large USA retirement community, aged 90+                                                                                           | 61%   | 2.5 | All                                 | 395      | 94%                                                                             | Age                                                                | CPH                           | Education (being college graduate)            | HR 1.03 (0.6–1.6)                                                  |
| Richard (102)  | Participants identified from a probability sample of Medicare beneficiaries in New York 1999–2001                                               | 98.9% | 5.1 | All MCI<br>SMC                      | 320      | 74%                                                                             | Age, sex education, ethnicity                                      | CPH                           | Depression (CES-D 4+)                         | HR 1.8 (1.0–3.1)                                                   |
| Scarmeas (61)  | Participants identified (via ethnicity and age stratification) from a Medicare probability sample of beneficiaries in New York in 1992 and 1999 | 64%   | 4.3 | aMCI                                | 482 (AD) | 85%                                                                             | cohort, age, sex, ethnicity, education, APOE, caloric intake, BMI, | CPH                           | Middle versus lowest MeDi adherence tertile   | aMCI/MCI: HR 0.48 (0.22–1.04; p=0.06); HR=0.55 (0.34–0.90); p=0.01 |
|                |                                                                                                                                                 |       |     | all                                 |          |                                                                                 |                                                                    |                               | Highest versus lowest tertile                 | aMCI/MCI: 0.71 (0.32–1.59) p=0.41; 0.52 (0.30–0.91) p=0.02         |
| Panza (103)    | Data from Italian Longitudinal Study of aging, a random sample population survey of people aged 65–84 from 8 municipalities                     | 83%   | 3.5 | aMCI normal MMSE for age/ education | 121      | 87%                                                                             | Sex, age, education, HT, CAD, smoking, stroke, DM, HC              | Poisson                       | Italian GDS 10+                               | Rate ratio 1.42 (0.48–4.23)                                        |
| Solfrizzi (39) |                                                                                                                                                 |       |     |                                     |          |                                                                                 |                                                                    | CPH                           | <1 drinks /day alcohol versus abstinence (AB) | HR 0.15 (0.03–0.78)                                                |
|                |                                                                                                                                                 |       |     |                                     |          |                                                                                 |                                                                    |                               | 1–2 drinks/day versus AB                      | HR 0.47 (0.08–2.73)                                                |
|                |                                                                                                                                                 |       |     |                                     |          |                                                                                 |                                                                    |                               | 2+drinks/day versus AB                        | HR 0.44 (0.05–4.06)                                                |
|                |                                                                                                                                                 |       |     |                                     |          |                                                                                 |                                                                    |                               | <1 drinks /day wine versus AB                 | HR 0.15 (0.03–0.77)                                                |
|                |                                                                                                                                                 |       |     |                                     |          |                                                                                 |                                                                    |                               | 1–2 drinks/day wine versus AB                 | HR 0.44 (0.07–2.64)                                                |
|                |                                                                                                                                                 |       |     |                                     |          |                                                                                 |                                                                    |                               | 2+drinks/day wine versus AB                   | HR 0.36 (0.03–4.26)                                                |
| Solfrizzi (41) |                                                                                                                                                 |       |     |                                     |          | Sex, age, education, GDS, alcohol, smoking, fibrinogen, cholesterol, HD, stroke | CPH                                                                | Metabolic syndrome            | HR 7.80 (1.29–47.20)                          |                                                                    |
| Solfrizzi (24) | None                                                                                                                                            |       |     |                                     |          |                                                                                 |                                                                    | Univariate Poisson regression | Education (<4 years)                          | RR 0.79 (0.23–3.44)                                                |
|                |                                                                                                                                                 |       |     |                                     |          |                                                                                 |                                                                    |                               | No hypertension                               | RR 1.74 0.46–9.74                                                  |
|                |                                                                                                                                                 |       |     |                                     |          |                                                                                 |                                                                    |                               | No coronary artery disease                    | RR 1.71 0.32–6.78                                                  |
|                |                                                                                                                                                 |       |     |                                     |          |                                                                                 |                                                                    |                               | No type II DM                                 | RR 0.54 0.01–3.62                                                  |
|                |                                                                                                                                                 |       |     |                                     |          |                                                                                 |                                                                    |                               | Never smoked                                  | RR 0.46 0.08–1.74                                                  |
|                |                                                                                                                                                 |       |     |                                     |          |                                                                                 |                                                                    |                               | Cholesterol, versus<4.5: 4.6–5.2              | RR 0.75 0.11–4.43                                                  |
|                |                                                                                                                                                 |       |     |                                     |          |                                                                                 |                                                                    |                               | 5.2–6.0                                       | RR 0.97 0.18–5.20                                                  |
|                |                                                                                                                                                 |       |     |                                     |          |                                                                                 |                                                                    |                               | >6.0                                          | RR 0.75 0.11–4.43                                                  |
|                |                                                                                                                                                 |       |     |                                     |          |                                                                                 |                                                                    |                               | HDL cholesterol (vs<1.0): 1.0–1.2             | RR 1.37 0.27–8.84                                                  |
|                |                                                                                                                                                 |       |     |                                     |          |                                                                                 |                                                                    |                               | 1.2–1.4                                       | RR 1.67 0.32–10.73                                                 |
| >1.4           | RR 0.30 0.01–3.75                                                                                                                               |       |     |                                     |          |                                                                                 |                                                                    |                               |                                               |                                                                    |

|                  |                                                                                                                                                |                           |         |                                              |                         |     |                                                                                       |                     |                                              |                                                           |
|------------------|------------------------------------------------------------------------------------------------------------------------------------------------|---------------------------|---------|----------------------------------------------|-------------------------|-----|---------------------------------------------------------------------------------------|---------------------|----------------------------------------------|-----------------------------------------------------------|
| St John (72)     | Random sample of residents aged 65+ of Manitoba, Canada                                                                                        | 61%                       | 5       | All; Modified MMSE < 78, CIND on examination | 85                      | 90% | Sex, age, education, MMSE, depression, function, SMC                                  | LR                  | self-rated health good                       | OR 1.05 (0.30–3.72)                                       |
|                  |                                                                                                                                                |                           |         |                                              |                         |     |                                                                                       |                     | Educations (years)                           | OR 0.88 (0.74–1.05)                                       |
| Caracciolo (104) | Kungsholmen Project, population-based prospective cohort study of all registered inhabitants aged 75+ in a Stockholm district, Sweden, in 1987 | 76%                       | 3       | All,                                         | 160                     | 85% | age, sex, education and APOE                                                          | CPH                 | Perceived sadness/ low mood at baseline      | aMCI: HR 5.9 (1.4 to 25.0)<br>All MCI: 1.4 (0.8 to 2.4)   |
| Xu (22)          |                                                                                                                                                |                           | 9       | aMCI,                                        | 302                     | 90% | age, sex, education, MMSE, survival, BMI, HD, stroke, bp, APOE antihypertensive drugs | CPH                 | Prediabetes (blood glucose 7.8 –11.0 mmol/l) | Dementia: HR 4.96 (2.27–10.84); AD: 5.73 (2.43–13.5)      |
|                  |                                                                                                                                                |                           |         | Non aMCI                                     |                         |     |                                                                                       |                     | Diabetes Mellitus                            | HR 2.87 (1.30–6.34)<br>AD: HR 2.83 (1.18–6.78)            |
|                  |                                                                                                                                                |                           |         |                                              |                         |     |                                                                                       |                     | DM or preDM                                  | aMCI: HR 2.24 (0.75– 6.71)<br>non a-MCI: 4.31 (1.97–9.42) |
| Palmer (60)      | 3                                                                                                                                              | aMCI<br>MMSE > 19;<br>SMC | 47 (AD) | 92.4%<br>WS                                  | age, sex, and education |     | Mood symptoms                                                                         | RR 0.9 (0.6–1.5)    |                                              |                                                           |
|                  |                                                                                                                                                |                           |         |                                              |                         |     |                                                                                       | Motivation symptoms | RR 1.1 (0.7–1.8)                             |                                                           |
|                  |                                                                                                                                                |                           |         |                                              |                         |     |                                                                                       | Anxiety symptoms    | RR 1.8 (1.2–2.7)                             |                                                           |

**TABLE S2. Characteristics and findings for other epidemiological studies**

| Study           | Recruitment source                                                               | FU, years | N    | Type of MCI          | Outcome                  | Analysis adjusted for..      | Model     | Prognostic factor                                                                                                                                                                                                                                       | Statistics                                                                                                             | Validity* |   |   |                                          |                   |                                         |                                                                         |
|-----------------|----------------------------------------------------------------------------------|-----------|------|----------------------|--------------------------|------------------------------|-----------|---------------------------------------------------------------------------------------------------------------------------------------------------------------------------------------------------------------------------------------------------------|------------------------------------------------------------------------------------------------------------------------|-----------|---|---|------------------------------------------|-------------------|-----------------------------------------|-------------------------------------------------------------------------|
|                 |                                                                                  |           |      |                      |                          |                              |           |                                                                                                                                                                                                                                                         |                                                                                                                        | 1         | 2 | 3 |                                          |                   |                                         |                                                                         |
| Artero (26)     | Random sample recruited from French electoral roles                              | 4         | 2882 | All                  | Dementia                 | None                         | ** UC, LR | Hypertension; coffee, alcohol, tobacco use; HRT<br>Hypercholesterolaemia; head trauma; depression; herpes; anesthesia; cancer; diabetes, vascular risks, asthma, antidepressants, subjective health, insomnia, BMI>27, appetite loss, social isolation, | Not significant on univariate comparisons for men or women (p>0.01; actual stats not shown)                            | n         | y | y |                                          |                   |                                         |                                                                         |
|                 |                                                                                  |           |      |                      |                          |                              |           |                                                                                                                                                                                                                                                         |                                                                                                                        |           |   |   | IWG criteria                             | IADL              | Subclinical depression                  | Women: OR 1.95 (1.06–3.58); p<0.03 Men NS                               |
|                 |                                                                                  |           |      |                      |                          |                              |           |                                                                                                                                                                                                                                                         |                                                                                                                        |           |   |   | S/ICC                                    | APOE              | Anticholinergic drugs                   | Women: OR 1.78 (1.00 –3.18) p=0.04; Men: NS                             |
|                 |                                                                                  |           |      |                      |                          |                              |           |                                                                                                                                                                                                                                                         |                                                                                                                        |           |   |   | Age                                      | Age               | Low education level                     | Men: OR 2.26 (1.25 to 4.06); p<0.01; Women: 2.16 (1.31 to 3.56); p<0.01 |
|                 |                                                                                  |           |      |                      |                          |                              |           |                                                                                                                                                                                                                                                         |                                                                                                                        |           |   |   | Stroke (men)                             | Stroke (men)      |                                         |                                                                         |
|                 |                                                                                  |           |      |                      |                          |                              |           |                                                                                                                                                                                                                                                         |                                                                                                                        |           |   |   | Gender-stratified                        | Gender-stratified |                                         |                                                                         |
| Blasko (62)     | People recruited for a population-based study of 75 year-olds in Vienna, Austria | 5         | 81   |                      | Dementia                 | none                         | LR        | Self-reported folate/B12 supplements versus (1) nonusers (2) inconsistent users                                                                                                                                                                         | (1) OR 0.15, 0.03–0.77 p=0.023 (2) OR 1.8 (0.6–5.6), p=0.330                                                           | n         | y | y |                                          |                   |                                         |                                                                         |
|                 |                                                                                  |           |      |                      |                          |                              |           |                                                                                                                                                                                                                                                         |                                                                                                                        |           |   |   | Serum homocysteine and B12 levels        | Not significant   |                                         |                                                                         |
|                 |                                                                                  |           |      |                      |                          |                              |           |                                                                                                                                                                                                                                                         |                                                                                                                        |           |   |   | sex, APOE, education, creatinine, folate | LR                | Ln of serum folate<br>Education (years) | OR 0.17 (0.04–0.69), p=0.013<br>OR 0.77 (0.58–1.01), p=0.062            |
| Brodsky (47)    | 70–90 years on Sydney electoral roll                                             | 2         | 319  | All (P)              | Dementia                 | age, sex, education          | LR        | NPI score $\geq$ 1                                                                                                                                                                                                                                      | OR 0.57 (0.1–2.8), p=0.49                                                                                              | n         | y | y |                                          |                   |                                         |                                                                         |
| Beaudreau (45)  | Adults aged 70+in USA aging study recruited to represent population              | 4         | 180  | All, panel diagnoses | Dementia                 | Age, APOE<br>Education, NPI  | LR        | Education (years)<br>NPI total scores                                                                                                                                                                                                                   | OR 0.97 (0.88, 1.07) p=0.56<br>OR 1.01 (0.97, 1.06) p=0.61                                                             | n         | y | y |                                          |                   |                                         |                                                                         |
|                 |                                                                                  |           |      |                      |                          |                              |           |                                                                                                                                                                                                                                                         |                                                                                                                        |           |   |   |                                          |                   |                                         |                                                                         |
| Chan et al (59) | People aged 60+from Hong Kong, and from old age hostels & day centers            | 2         | 321  | All<br>SMC           | Dementia                 | MMSE, education, age, gender | LR        | Education (years)<br>depression/dysphoria<br>apathy/indifference<br>aberrant motor behavior                                                                                                                                                             | OR 0.98 (0.87–1.09) p=0.67<br>OR 2.40 (1.05–5.46) p=0.04<br>OR 0.31 (0.09–1.13) p=0.08<br>OR 9.96 (0.57–174.42) p=0.12 | n         | y | y |                                          |                   |                                         |                                                                         |
|                 |                                                                                  |           |      |                      |                          |                              |           |                                                                                                                                                                                                                                                         |                                                                                                                        |           |   |   |                                          |                   |                                         |                                                                         |
|                 |                                                                                  |           |      |                      |                          |                              |           |                                                                                                                                                                                                                                                         |                                                                                                                        |           |   |   |                                          |                   |                                         |                                                                         |
|                 |                                                                                  |           |      |                      |                          |                              |           |                                                                                                                                                                                                                                                         |                                                                                                                        |           |   |   |                                          |                   |                                         |                                                                         |
| Lopez (105)     | Random sampling of Pittsburgh Medicare                                           | Mean 4.3  | 136  | aMCI and MD-MCI      |                          | Nil                          | **UC      | > High school education, No. (%)                                                                                                                                                                                                                        | NS, chi2=2.43                                                                                                          | n         | y | y |                                          |                   |                                         |                                                                         |
| Meyer (80)      | Participants who developed MCI during longitudinal study                         | mean 3.9  | 73   | SMC                  | AD and vascular dementia | None                         | **UC      | Education (years)                                                                                                                                                                                                                                       | AD, C/NC: 11.54 versus 14.57, p<0.01                                                                                   | n         | y | y |                                          |                   |                                         |                                                                         |
|                 |                                                                                  |           |      | All                  |                          |                              |           |                                                                                                                                                                                                                                                         | VaD, C/NC: 13.13 versus 14.57                                                                                          |           |   |   |                                          |                   |                                         |                                                                         |

|                  |                                                                             |   |     |     |          |                                                                     |    |              |                                                                                                                               |   |   |   |
|------------------|-----------------------------------------------------------------------------|---|-----|-----|----------|---------------------------------------------------------------------|----|--------------|-------------------------------------------------------------------------------------------------------------------------------|---|---|---|
|                  |                                                                             |   |     |     | ntia     |                                                                     |    |              |                                                                                                                               |   |   |   |
| Oveisgharan (30) | Participants in Canadian Study of Ageing, recruited to represent population | 5 | 990 | All | Dementia | Age, sex, APOE, cognitive impairment subtypes and interaction terms | LR | Hypertension | NS (results not given); in subgroup with executive dysfunction, hypertension, 57.7% versus normotension 28.0%, P=0.02), in UC | y | n | y |

**TABLE S3. Characteristics and findings for clinical studies**

| Study               | Recruitment source                                                                                                                                  | FU, years | N   | Type of MCI                               | Outcome           | Analysis adjusted for..                                                  | Model               | Prognostic factor                                     | Statistics                                            | Validity (see method)                                 |                    |                             |   |   |   |
|---------------------|-----------------------------------------------------------------------------------------------------------------------------------------------------|-----------|-----|-------------------------------------------|-------------------|--------------------------------------------------------------------------|---------------------|-------------------------------------------------------|-------------------------------------------------------|-------------------------------------------------------|--------------------|-----------------------------|---|---|---|
|                     |                                                                                                                                                     |           |     |                                           |                   |                                                                          |                     |                                                       |                                                       | 1                                                     | 2                  | 3                           |   |   |   |
| Abner (29)          | Recruits from Kentucky AD center who entered a longitudinal study (BRAiNS), who agreed to brain donation, when cognitively intact and developed MCI | 10        | 101 | All, aMCI, S/ICC, Intact global cognition | Dementia          | APOE, age, gender, family history, education, hypertension, MCI duration | Markov chain        | Hypertension                                          | RR 0.30 (0.10–0.93)                                   | n                                                     | y                  | y                           |   |   |   |
| Abner (37)          |                                                                                                                                                     |           | 649 |                                           |                   |                                                                          |                     | Vs never smoked: <1–10 pack-years versus never smoked | OR 0.28 (0.08–0.94) p=0.039                           | n                                                     | y                  | y                           |   |   |   |
|                     |                                                                                                                                                     |           |     |                                           |                   |                                                                          |                     | 10–20 pack-years                                      | OR 0.28 (0.08–0.94) 0.04                              | n                                                     | y                  | y                           |   |   |   |
|                     |                                                                                                                                                     |           |     |                                           |                   |                                                                          |                     | ≥20 pack-years                                        | OR 0.31 (0.13–0.71) p=0.005                           | n                                                     | y                  | y                           |   |   |   |
| Kryscio (75)        |                                                                                                                                                     |           | 554 |                                           | Dementia          | APOE, age, gender, family history, education                             | polytomous LR       | □12 versus □16 years education                        | Amnestic: OR 1.00 (0.32–3.14) Mixed: 0.38 (0.05–3.12) | n                                                     | y                  | y                           |   |   |   |
|                     |                                                                                                                                                     |           |     |                                           |                   |                                                                          |                     |                                                       | 13–15 versus □16 years education                      | Amnestic: OR 0.92 (0.39–2.16) Mixed: 1.56 (0.64–3.79) | n                  | y                           | y |   |   |
| Kryscio (36)        |                                                                                                                                                     |           |     |                                           |                   |                                                                          |                     |                                                       |                                                       | Years to diagnosis                                    | HRT                | Mean (SD) 1.3±0.5, p=0.0029 | n | y | y |
|                     |                                                                                                                                                     |           |     |                                           |                   |                                                                          |                     |                                                       |                                                       |                                                       | Smoker at baseline | 0.66±0.26, p=0.043          | n | y | y |
| Alefret (68)        | Clinical convenience sample                                                                                                                         | 4         | 42  | aMCI(P)                                   | AD                | Age, gender                                                              | CPH                 | 2ndry school education                                | HR 1.80 (0.70–4.67)                                   | n                                                     | y                  | y                           |   |   |   |
| Amieva (70)         | Participants in drug RCT, no history of depression or stroke                                                                                        | 2         | 90  | SMC aMCI                                  | Dementia          | —                                                                        | **UC                | % primary school diploma                              | C/NC 89.7% versus 88.5% (p=0.99)                      | n                                                     | y                  | y                           |   |   |   |
| Aretouli et al (76) | Research centers and clinics in USA                                                                                                                 | 2         | 104 | All                                       | Dementia (CDR□1)  | —                                                                        | **UC                | Education (years)                                     | F(1,92)=0.02, p=0.890                                 | n                                                     | y                  | y                           |   |   |   |
| Barabash (69)       | Consecutive, Madrid Memory Unit                                                                                                                     | 1.7       | 89  | aMCI, SMC                                 | AD                | Age, APOE, genetics                                                      | CPH                 | < 10 years schooling                                  | HR 0.23 (0.05–0.98) p=0.016                           | n                                                     | y                  | y                           |   |   |   |
| Betterman (106)     | Recruited from 4 USA academic centers                                                                                                               | 6         | 482 | All                                       | Dementia (expert) | age, sex, race, APOE, education, stroke,                                 | CPH                 | Statin ever                                           | HR 0.88 (0.64–1.21) p=0.43                            | n                                                     | y                  | y                           |   |   |   |
|                     |                                                                                                                                                     |           |     |                                           |                   |                                                                          | Other lipid lowerer | HR 0.78 (0.36–1.68), p=0.52                           |                                                       |                                                       |                    |                             |   |   |   |



|                    |                                                                        |     |            |               |          |                                                                          |            |                               |                                                |   |   |   |  |
|--------------------|------------------------------------------------------------------------|-----|------------|---------------|----------|--------------------------------------------------------------------------|------------|-------------------------------|------------------------------------------------|---|---|---|--|
|                    |                                                                        |     |            |               | panel)   | HD                                                                       |            |                               |                                                |   |   |   |  |
| Brodaty (42)       | 9 Australian memory clinics                                            | 3   | 185        | All (P)       | Dementia | Age, sex, MMSE                                                           | CPH        | Depression (NPI subscale)     | HR 1.08 (0.98–1.19)                            |   |   |   |  |
|                    |                                                                        |     |            |               |          |                                                                          |            | NPI (total & 6 m change)      | Not significant, results not given             |   |   |   |  |
| Chilovi et al (58) | Outpatient aging clinic, Brescia, Italy                                | 2   | 124        | All           | Dementia | Age, Barthel Index, ADAS-Cog                                             | LR         | Clinical depression           | OR 0.10 (0.02–0.39); p=0.001                   | n | y | y |  |
|                    |                                                                        |     |            | S/ICC         |          |                                                                          |            | Clinically significant apathy | OR 7.07 (1.99–25.17); p=0.003                  |   |   |   |  |
| Devanand (67)      |                                                                        | 4.5 | 139        | All SMC       | Dementia | —                                                                        | **UC       | Education (years)             | C/NC: mean 14.1(SD 4.5) versus 15.6 (4.0)      | n | y | y |  |
| Devier (53)        | New York Memory clinic attendees, without psychiatric diagnosis or CVA | 1–9 | 108<br>148 | aMCI          | AD       | Cognition, education and stratified for age (and other variables tested) | CPH        | State anxiety                 | HR 1.68 (0.75–3.77) p=0.21                     | n | y | y |  |
|                    |                                                                        |     |            |               |          |                                                                          |            | Trait anxiety                 | aMCI: 0.35 (0.14–0.85) p=0.02                  |   |   |   |  |
|                    |                                                                        |     |            |               |          |                                                                          |            |                               | All MCI: HR 0.36 (0.16–0.82) p=0.015           |   |   |   |  |
|                    |                                                                        |     |            |               |          |                                                                          |            | Hamilton depression score     | All MCI: HR 1.01 (0.92–1.10) p=0.86            |   |   |   |  |
|                    |                                                                        |     |            | SMC           |          |                                                                          |            |                               |                                                |   |   |   |  |
|                    |                                                                        |     |            |               |          |                                                                          |            | Education (years)             | HR 1.01 (0.93, 1.10) p=0.81                    |   |   |   |  |
| Edwards (49)       | Records, Californian memory clinics                                    | 1.6 | 270        | All           | Dementia | Age, MMSE, function, site, comorbidity                                   | LR         | 4+neuropsychiatric symptoms   | OR=2.44 (1.07–5.55)                            | n | n | y |  |
| Farias (74)        | Clinic referrals and outreach                                          | 2   | 1111       | All           | Dementia | memory, age, education                                                   | CPH        | Education (years)             | NS                                             | n | y | y |  |
| Fellows (38)       | Canadian memory clinic                                                 | 3.3 | 90         | aMCI<br>S/IMC | AD       | age onset, MMSE, sex, education, function                                | UC;<br>LR  | Smoking (pack years)          | OR 0.98 (0.95–1.00) p=0.13                     | n | y | y |  |
|                    |                                                                        |     |            |               |          | None                                                                     | **UC       | Education (years)             | C/NC: (mean(SD): 10.6 (3.6) versus 10.9 (3.3)) | n | y | y |  |
|                    |                                                                        |     |            |               |          |                                                                          |            | GeDS>6                        | C/NC 55 versus 62, p=0.53                      |   |   |   |  |
|                    |                                                                        |     |            |               |          |                                                                          |            | Alcohol consumption           | C/NC 45 versus 44, p=0.92                      |   |   |   |  |
|                    |                                                                        |     |            |               |          |                                                                          |            | Vascular risk factors         | C/NC 60 versus 45 p=0.15                       |   |   |   |  |
| Fleischer (107)    | Participants in an RCT                                                 | 3   | 539        | aMCI          | AD       | Age, sex, cognition, FHx                                                 | GLM        | Education (years)             | NS                                             | n | y | y |  |
| Gabryelewicz (52)  | Participants in a longitudinal study recruited                         | 3   | 105        | All           | Dementia | Age                                                                      | ANC<br>OVA | Higher baseline MADRS score   | F=4.83, p=0.010                                | n | y | n |  |

|                |                                                                                                                                                                         |               |     |          |                                                                 |                                                      |     |                                                          |                                                                   |   |   |   |
|----------------|-------------------------------------------------------------------------------------------------------------------------------------------------------------------------|---------------|-----|----------|-----------------------------------------------------------------|------------------------------------------------------|-----|----------------------------------------------------------|-------------------------------------------------------------------|---|---|---|
| Gavrilova (64) | from consecutive referrals to Warsaw clinic MADRS score 28 or less                                                                                                      |               |     | SMC      |                                                                 |                                                      |     | Higher baseline homocysteine levels                      | MD-MCI: 16.53 umol/l versus 14.36 umol/l; U=713, p=0.037 aMCI: ns |   |   |   |
| Grande (82)    | Milan (Italy) memory clinic                                                                                                                                             | Median<br>2.6 | 176 | All      | Dementia                                                        | age, gender, education, MMSE, GDS, MCI subtype, APOE | CPH | Physical activity score (vs lowest tertile): middle 3le  | HR 0.59 (0.32 to 1.10)                                            | n | y | y |
|                |                                                                                                                                                                         |               |     | SCC      |                                                                 |                                                      |     | Highest tertile                                          | HR 0.36 (0.18 to 0.75)                                            |   |   |   |
|                |                                                                                                                                                                         |               |     |          |                                                                 |                                                      |     | Social activity score (vs lowest tertile): middle 3le    | HR 0.82 (0.54 to 2.15)                                            |   |   |   |
|                |                                                                                                                                                                         |               |     |          |                                                                 |                                                      |     | Highest tertile                                          | HR 0.42 (0.68 to 2.56)                                            |   |   |   |
|                |                                                                                                                                                                         |               |     |          |                                                                 |                                                      |     | Cognitive activity score (vs lowest tertile): middle 3le | HR 0.54 (0.26 to 1.14)                                            |   |   |   |
|                |                                                                                                                                                                         |               |     |          |                                                                 |                                                      |     | Highest tertile                                          | HR 0.89 (0.45 to 1.77)                                            |   |   |   |
| Ravaglia (27)  | Bologna (Italy) geriatric clinic attendees aged 60+with reliable informant, without psychiatric disorder recruited from March 1999 to March 2004 and August 2005 (Forti | Mean<br>2.8   | 165 | All      | Dementia, deficits in 2+cognitive domains affecting functioning | Age, gender, education                               | CPH | Ever smoking                                             | HR 0.54 (0.22–1.32)<br>p<0.177                                    | n | y | y |
|                |                                                                                                                                                                         |               |     | S/IMC    |                                                                 |                                                      |     | Diastolic bp (–10mmHg)                                   | HR 0.56 (0.39–0.80)<br>p<0.001                                    |   |   |   |
|                |                                                                                                                                                                         |               |     | MMS E>23 |                                                                 |                                                      |     | Systolic (–10mmHg)                                       | HR 0.81 (0.69–0.95)<br>p<0.013                                    |   |   |   |
|                |                                                                                                                                                                         |               |     |          |                                                                 |                                                      |     | Hypertension                                             | HR 1.25 (0.70–2.45)<br>p<0.453                                    |   |   |   |
|                |                                                                                                                                                                         |               |     |          |                                                                 |                                                      |     | BMI (vs 25.1–27.6): <25                                  | HR 2.07 (1.04–4.14)<br>p<0.039                                    |   |   |   |
|                |                                                                                                                                                                         |               |     |          |                                                                 |                                                      |     | 27.7–29.9                                                | HR 0.53 (0.20–1.37)<br>p=0.189                                    |   |   |   |
|                |                                                                                                                                                                         |               |     |          |                                                                 |                                                      |     | >30                                                      | HR 0.62 (0.26–1.46)<br>p=0.270                                    |   |   |   |
|                |                                                                                                                                                                         |               |     |          |                                                                 |                                                      |     | Diabetes                                                 | HR 0.75 (0.26–2.13)<br>p<0.593                                    |   |   |   |
|                |                                                                                                                                                                         |               |     |          |                                                                 |                                                      |     | Cardiovascular disease                                   | HR 0.90 (0.44–1.84)<br>p<0.780                                    |   |   |   |
|                |                                                                                                                                                                         |               |     |          |                                                                 |                                                      |     | Chol (Ref 5.3–6.): <5.3:                                 | HR 1.78 (0.85–3.70)<br>p=0.123                                    |   |   |   |
|                |                                                                                                                                                                         |               |     |          |                                                                 |                                                      |     | 6.0–6.5 mmol/l                                           | HR 0.38 (0.13–1.07)<br>p=0.068                                    |   |   |   |
|                |                                                                                                                                                                         |               |     |          |                                                                 |                                                      |     | >6.5 mmol/l                                              | HR 0.29 (0.09–0.87)<br>p=0.028                                    |   |   |   |
|                |                                                                                                                                                                         |               |     |          |                                                                 |                                                      |     | Vitamin B12 □217 pmol/l                                  | HR 0.60 (0.26–1.39)                                               |   |   |   |

|                  |                                                                                 |          |     |                                      |              |                                                                   |                              |                                    |                                                  |   |   |   |
|------------------|---------------------------------------------------------------------------------|----------|-----|--------------------------------------|--------------|-------------------------------------------------------------------|------------------------------|------------------------------------|--------------------------------------------------|---|---|---|
|                  |                                                                                 |          |     |                                      |              |                                                                   |                              |                                    | p=0.234                                          |   |   |   |
|                  |                                                                                 |          |     |                                      |              |                                                                   |                              | Serum folate $\square$ 10.4 nmol/l | HR 2.23 (1.12–4.43)<br>p=0.022                   |   |   |   |
| Forti (83)       |                                                                                 |          | 180 |                                      |              | + MMSE, bp, BMI, folate                                           | CPH                          | Atrial fibrillation                | HR 4.63 (1.72–12.46)<br>p<0.002                  | n | y | y |
|                  |                                                                                 |          |     |                                      |              | None                                                              | **UC                         | Education>5 years                  | C/NC: 14 (26.9) versus 29(22.6) p=0.54           | n | y | y |
| Maioli (34)      |                                                                                 | 1.2      | 52  |                                      |              | None                                                              | **UC                         | Serum HDL mg/dl                    | C/NC 70(25) versus 58 (13), p=0.058              | n | y | y |
|                  |                                                                                 |          |     |                                      |              |                                                                   |                              | Serum LDL mg/dl                    | C/NC: 106 (42) versus 122 (52) p=0.359           |   |   |   |
| Hansson (32)     | Attendees from a Swedish memory clinic, who agreed to provide a sample of CSF   | 4        | 137 | aMCI<br>SMC                          | AD           | age, sex, education level, APOE E4                                | CPH                          | Received higher education          | HR 0.80 (0.45–1.43)                              | n | y | y |
|                  |                                                                                 |          |     |                                      |              |                                                                   |                              | Systolic bp                        | HR 1.00 (0.98–1.01)                              |   |   |   |
|                  |                                                                                 |          |     |                                      |              |                                                                   |                              | Diastolic bp                       | HR 0.99 (0.97–1.02)                              |   |   |   |
|                  |                                                                                 |          |     |                                      |              |                                                                   |                              | Homocysteine                       | HR 1.08 (1.04–1.12)                              |   |   |   |
| Hsiung (43, 108) |                                                                                 | 2        | 68  | All;<br>MCI<br>on<br>exami<br>nation | AD,<br>VaD   | age, sex                                                          | LR                           | Education (years)                  | AD: OR 0.82 (0.76–0.89)<br>VaD: 0.62 (0.49–0.79) | n | n | y |
|                  | Recruited from 8 Canadian memory clinics                                        |          |     |                                      |              |                                                                   | **UC                         | NPI                                | C/NC: 4.3(6.3) versus 11.0 (20.1)                | n | n | y |
|                  |                                                                                 |          |     |                                      |              |                                                                   |                              | Chronic medical illness            | C/NC 5.2 (4.3) versus 5.3 (3.9)                  |   |   |   |
| Jack (28)        | Consecutive patients 60–89 from Mayo clinic research registry                   | 2.7      | 80  | S/IMC<br>aMCI                        | AD           | none                                                              | nonpa<br>rametr<br>ic<br>CPH | Hypertension                       | RR 1.63 p=0.272                                  | n | y | y |
|                  |                                                                                 |          |     |                                      |              |                                                                   |                              | Ischemic heart disease             | RR 0.55 p=0.272                                  |   |   |   |
|                  |                                                                                 |          |     |                                      |              |                                                                   |                              | Estrogen replacement               | RR 1.09 p=0.864                                  |   |   |   |
| Korf (31)        | Consecutive attenders at a geriatric clinic, Stockholm, Sweden                  | 2.8      | 75  | All                                  | Demen<br>tia | time                                                              | CPH                          | Education (years)                  | HR 0.93 (0.82–1.06)                              | n | y | y |
|                  |                                                                                 |          |     |                                      |              |                                                                   |                              | Hypertension                       | HR 0.62 (0.27–1.42)                              |   |   |   |
|                  |                                                                                 |          |     |                                      |              |                                                                   |                              | Depression                         | HR 0.76 (0.38–1.52)                              |   |   |   |
| Lee (81)         | Aged 55+, $\square$ 1 FU, South Korean study                                    | 1.4<br>7 | 504 | All;<br>SCC                          | AD           | Age, MMSE score                                                   | CPH                          | Education (years)                  | HR 1.08 (1.04–1.13)<br>p<0.001                   | n | y | y |
| Li (19)          | Inpatients in a Chinese hospital those with CVA or depressive disorder excluded | 3        | 257 | aMCI<br>SMC                          | AD           | Age, covariates listed; carotid stenosis, stroke during follow-up | CPH                          | diabetes mellitus                  | HR 2.39 (1.07–5.33) p=0.03                       | n | y | y |
|                  |                                                                                 |          |     |                                      |              |                                                                   |                              | Education (> 6 years)              | HR 0.48 (0.21–1.10) p=0.08                       |   |   |   |
|                  |                                                                                 |          |     |                                      |              |                                                                   |                              | Hypertension                       | HR 0.71 (0.22–2.22) p=0.55                       |   |   |   |
|                  |                                                                                 |          |     |                                      |              |                                                                   |                              | Antihypertensives                  | HR 1.22 (0.48–3.13) 0.68                         |   |   |   |

|               |                                                                                                                       |     |     |                   |                   |                                                  |               |                                                                   |                                                                                                             |   |   |   |
|---------------|-----------------------------------------------------------------------------------------------------------------------|-----|-----|-------------------|-------------------|--------------------------------------------------|---------------|-------------------------------------------------------------------|-------------------------------------------------------------------------------------------------------------|---|---|---|
|               |                                                                                                                       |     |     |                   |                   | and white matter changes                         |               | antihyperglycemic                                                 | HR 2.08 (0.66–6.54) p=0.21                                                                                  |   |   |   |
| Luis (109)    | Record review Miami memory clinic                                                                                     | 2.4 | 134 | All<br>SCC        | Dementia          | Age, sex, MMSE, subtype                          | CPH           | Education (years)                                                 | NS (results not given)                                                                                      | n | y | y |
| Mauri (110)   | Italian outpatient clinic patients                                                                                    | 3   | 119 | All               | Dementia          | None                                             | No tests      | Mild parkinsonism symptoms at baseline                            | 11/22 (50%) with MPS at baseline and 35/97 without developed dementia; trend (p<0.05) for vascular dementia | n | y | y |
| Modrego (51)  | Consecutive Spanish outpatient clinic patients                                                                        | 3   | 114 | aMCI<br>SMC       | Dementia          | None                                             | Log-rank test | Depression diagnosed by structured clinical interview             | HR: 4.1; 2.4–6.9                                                                                            | n | y | y |
| Olazaran (77) | Recruited by primary care physicians in a Madrid practice                                                             | 1   | 81  | All               | Dementia          | Age, sex                                         | LR            | Higher educational level (not illiterate or incomplete education) | OR 0.13 (0.02–0.77) 0.024                                                                                   | n | y | y |
| Palmer (56)   | Consecutive new diagnoses at 3 Rome memory clinics                                                                    | 4   | 131 | aMCI              | AD                | age, sex, apathy, MMSE, education, depression    | CPH           | Depression diagnosis                                              | HR 0.6 (0.2–1.8)                                                                                            | n | y | y |
|               |                                                                                                                       |     |     |                   |                   |                                                  |               | Apathy diagnosis                                                  | HR 6.9 (2.3–20.6)                                                                                           |   |   |   |
|               |                                                                                                                       |     |     |                   |                   |                                                  |               | NPI apathy score 2+                                               | HR=4.6 (1.3–16.2)                                                                                           |   |   |   |
| Peavy (111)   | Research center & clinic, aged 65+, no mental illness, 3 follow-ups                                                   | 2.5 | 33  | All (P)           | Dementia          | Age, gender, education, cortisol, APOE           | LR            | Education (years)                                                 | NS (data not shown)                                                                                         | n | y | y |
| Perri (112)   | Aged 50–80, USA memory clinics, $\geq$ 5 years education                                                              | 2   | 190 | aMCI              | AD                | Age, gender, cognition                           | LR            | Education (years)                                                 | NS (p=0.85)                                                                                                 | n | y | y |
|               |                                                                                                                       |     |     | S+IMC             |                   |                                                  |               |                                                                   |                                                                                                             |   |   |   |
| Prasad (20)   | Patients at a tertiary neurology memory clinic with follow-up information available for 18 months including MRI scans | 1.5 | 79  | aMCI              | Dementia (all AD) | none                                             | **UC          | Education (years)                                                 | C/NC: 8.3 versus 10.2 p=0.098                                                                               | n | n | y |
|               |                                                                                                                       |     |     | Diabetes mellitus |                   |                                                  |               | C/NC: N=10 (43.5%) versus 15 (28.9) p=0.215                       |                                                                                                             |   |   |   |
|               |                                                                                                                       |     |     | Hypertension      |                   |                                                  |               | C/NC: 11 (47.8) versus 28 (52.8) p=0.094                          |                                                                                                             |   |   |   |
|               |                                                                                                                       |     |     | Hyperlipidemia    |                   |                                                  |               | C/NC: 10 (45.4) versus 36 (67.9) p=0.032                          |                                                                                                             |   |   |   |
| Mackin (35)   | ADNI database, recruited from 50+sites in USA and Canada without depression (GDS<6)                                   | 2–3 | 405 | aMCI              | AD                | ApoE, intracranial volume, white matter lesions, | CPH           | GDS score 1–5 (sub syndromal depression) versus GDS=0             | NS (statistics not given)                                                                                   | n | y | y |
|               |                                                                                                                       |     |     | S+IMC             |                   |                                                  |               |                                                                   |                                                                                                             |   |   |   |
|               |                                                                                                                       |     |     | MMS               |                   |                                                  |               |                                                                   |                                                                                                             |   |   |   |

|                |                                                                                                                                              |             |                   | E<br>>23         |                      | demographics<br>removed as NS                                             |            |                                  |                                                                    |   |   |   |
|----------------|----------------------------------------------------------------------------------------------------------------------------------------------|-------------|-------------------|------------------|----------------------|---------------------------------------------------------------------------|------------|----------------------------------|--------------------------------------------------------------------|---|---|---|
|                |                                                                                                                                              | 3           | 227               | SMC              | Dementia<br>(NINCDS) | None                                                                      | **UC       | Education (years)                | C/NC: 15.9 (2.9) versus 16.0 (2.8) p=0.72                          | n | n | y |
|                |                                                                                                                                              |             |                   | aMCI             |                      |                                                                           |            | GeDS 6+at follow-up              | OR=1.88, p=0.15                                                    |   |   |   |
|                |                                                                                                                                              |             |                   |                  |                      |                                                                           |            | GeDS score                       | C/NC: 1.6 (1.3) versus 1.5 (1.4) p=0.38                            |   |   |   |
|                |                                                                                                                                              |             |                   |                  |                      |                                                                           |            | Serum LDL mg/dl                  | C/NC:106 (42) versus 122 (52) p=0.359                              |   |   |   |
| Morris (21)    |                                                                                                                                              | 2           | 264               |                  |                      | Education, age, sex                                                       | ANOV A     | Impaired glycaemia               | C/NC:48.5% versus 32.3% p=0.009                                    | n | y | y |
| Richard (55)   |                                                                                                                                              | mean 2.7    | 151<br>219<br>211 |                  |                      | age, gender, education and baseline MMSE score                            | CPH        | Apathy symptoms                  | HR 1.85 (1.09–3.15)                                                | n | y | y |
|                |                                                                                                                                              |             |                   |                  |                      |                                                                           |            | CES-D score 4+                   | HR 1.15 (0.72–1.83)                                                |   |   |   |
|                |                                                                                                                                              |             |                   |                  |                      |                                                                           |            | Apathy and depression            | HR 1.05 (0.91–1.23)                                                |   |   |   |
| Schneider (84) |                                                                                                                                              | 2           | 402               |                  |                      | age, APOE, education ADAS-cog score                                       | Weibul 1 R | ChEI versus no treatment         | 29.8% reduced time to dementia (p=0.005)                           | n | y | y |
|                |                                                                                                                                              |             |                   |                  |                      |                                                                           |            | ChEI and memantine               | 41.8% reduced time to dementia (p=0.003)                           |   |   |   |
| Robert (57)    | Patients from 14 French memory clinics aged 58+, >4 years education, with informant; not MADRS score>20 or significant brain vascular change | 1           | 216               | aMCI             | AD                   | age, sex, educational level, MADRS total score and Goldberg anxiety scale | LR         | Psychiatric history              | C/NC 31.8 versus 19.7, p=0.16                                      | n | y | y |
|                |                                                                                                                                              |             |                   | SMC              |                      |                                                                           |            | Education (% tertiary)           | C/NC 31.8 versus 44.3, p=0.22                                      |   |   |   |
|                |                                                                                                                                              |             |                   | MMS              |                      |                                                                           |            | Goldberg anxiety scale           | C/NC 2.6 (2.5) versus 2.9 (2.5) p=0.16                             |   |   |   |
|                |                                                                                                                                              |             |                   | E                |                      |                                                                           |            | MADRS total score (% >10)        | C/NC 31.8 versus 18.6, p=0.26                                      |   |   |   |
|                |                                                                                                                                              |             |                   | >24              |                      |                                                                           |            | Apathy                           | C/NC 59.1 versus 37.6, p=0.10                                      |   |   |   |
| Rosenberg (50) | Data from National Alzheimer Coordinating Center database, USA                                                                               | Median 1.58 | 1821              | All              | Dementia             | Cognition, age, ethnicity                                                 | CPH        | NPI middle versus lowest tertile | Dementia/AD: HR 1.43 (1.15–1.80) p=0.002/ 1.48 (1.17–1.88) p=0.001 | n | n | y |
|                |                                                                                                                                              |             |                   | Expert diagnosis | AD                   |                                                                           |            | NPI top versus lowest tertile    | HR 1.5(1.2–1.9)<0.001/1.4(1.1–1.7)                                 |   |   |   |
|                |                                                                                                                                              |             |                   |                  |                      |                                                                           |            |                                  |                                                                    |   |   |   |

|               |                                                                              |     |     |                         |                   |                   |      |                                                          |                                                                         |   |   |   |
|---------------|------------------------------------------------------------------------------|-----|-----|-------------------------|-------------------|-------------------|------|----------------------------------------------------------|-------------------------------------------------------------------------|---|---|---|
|               |                                                                              |     |     |                         |                   |                   |      |                                                          | 0.013                                                                   |   |   |   |
|               |                                                                              |     |     |                         |                   |                   |      | GDS mid versus lowest tertile                            | HR 1.4 (1.1–1.7) 0.003 / 1.3 (1.0–1.6) p=0.05                           |   |   |   |
|               |                                                                              |     |     |                         |                   |                   |      | GDS top versus lowest tertile                            | HR 1.37 (1.1–1.71) p=0.01/1.17 (0.92–1.5)p=0.21                         |   |   |   |
| Rozzini (113) | Consecutive referrals to Italian memory clinic                               | 2   | 46  | Not stated              | Dementia          | None              | **UC | Depression diagnosis at baseline                         | 17/24 without depression developed dementia versus 8/22 with depression | n | y | y |
| Rozzini (44)  |                                                                              | 1   | 119 | aMCI                    | AD                | None              | **UC | Education (years)                                        | NS                                                                      | n | y | y |
|               |                                                                              |     |     | S/IMC                   |                   |                   |      | NPI                                                      | C/NC: 14.5 (11.2) versus 12.6 (10.7) NS                                 |   |   |   |
|               |                                                                              |     |     |                         |                   |                   |      | GeDS                                                     | C/NC: 4.3 (3.6) versus 4.7 (3.1) NS                                     |   |   |   |
|               |                                                                              |     |     |                         |                   |                   |      | Hamilton anxiety scale                                   | C/NC: 8.5 (6.4) versus 10.4 (6.5)                                       |   |   |   |
|               |                                                                              |     |     |                         |                   |                   |      | Number of drugs                                          | C/NC: 2.8 (2.2) versus 2.5 (1.8)                                        |   |   |   |
| Sachdev (79)  | Patients at two Australian hospitals, 3–6 months after ischemic stroke / TIA | 3   | 45  | All                     | Vascular dementia | None              | **UC | Education (years)                                        | NS (stats not given)                                                    | n | n | y |
| Siuda (63)    | Polish Neurology outpatient clinic                                           | 1   | 55  | SMC                     | Dementia          | None              | **UC | Total homocysteine ( $\mu$ mol/L)                        | C/NC: 19.83 (7.31) versus 19.85 (7.64) p=0.645                          | n | y | y |
|               |                                                                              |     |     | Objective cognitive imp |                   |                   |      | Vitamin B12 (pg/mL)                                      | C/NC: 376.11 (173.44) versus 495.32 (335.78) p=0.143                    |   |   |   |
|               |                                                                              |     |     |                         |                   |                   |      | Folic acid (ng/mL)                                       | C/NC: 3.60 (1.72) versus 3.75 (1.90) p=0.752                            |   |   |   |
| Squitti (65)  | Italian memory clinic, GDS<14                                                | 2–6 | 141 | aMCI                    | AD                | Age, gender, MMSE | CPH  | Serum Nonceruloplasmin Copper                            | HR 1.23 (1.03–1.47), p=0.022                                            | n | y | y |
|               |                                                                              |     |     |                         |                   |                   |      | transferrin, ferritin hypercholesterolemia, hypertension | Not significant (data not shown)                                        |   |   |   |
| Taragano (48) | Consecutive patients, Argentinian clinic                                     | 5   | 239 | Any SCC                 | Dementia          | None stated       | CPH  | Psychiatric symptoms                                     | HR 4.01 (2.5–6.3)                                                       | n | y | y |
| Teng (46)     | Memory clinic patients aged                                                  | 2   | 51  | Any                     | AD                | MMSE,             | ANC  | Any neuropsychiatric                                     | F(1, 40) = 5.23 p=0.028                                                 | n | y | y |

|                 | 50+                                                                     |           |     | SCC                    |                          | subtype, sex                                               | OVA  | symptoms                                   |                                                         |   |   |   |
|-----------------|-------------------------------------------------------------------------|-----------|-----|------------------------|--------------------------|------------------------------------------------------------|------|--------------------------------------------|---------------------------------------------------------|---|---|---|
| Velayudhan (23) | People aged 65+primary care practices in south London, UK               | 4         | 61  | aMCI<br>SMC            | Dementia                 | Age, gender, APOE, IQ, education, smoking, health          | CPH  | Diabetes                                   | HR 2.9 (1.1–7.3)                                        | n | y | y |
|                 |                                                                         |           |     |                        |                          |                                                            |      | Duration of diabetes                       | HR 0.9 (0.7–1.1) 0.29                                   |   |   |   |
|                 |                                                                         |           |     |                        |                          | None                                                       |      | Depression                                 | HR 1.4 (0.5–3.9) p=0.5                                  | n | y | y |
|                 |                                                                         |           |     |                        |                          |                                                            |      | Education                                  | HR 1.0 (0.9–1.2) p=0.61                                 |   |   |   |
|                 |                                                                         |           |     |                        |                          |                                                            |      | Coronary heart disease                     | HR 1.1 (0.4–2.8) p=0.85                                 |   |   |   |
|                 |                                                                         |           |     |                        |                          |                                                            |      | Drinking alcohol                           | HR 2.6 (0.7–8.8) p=0.1                                  |   |   |   |
|                 |                                                                         |           |     |                        |                          |                                                            |      | Lifetime smoking status                    | HR 0.8 (0.17–4.3) p=0.8                                 |   |   |   |
| Visser (114)    | new consecutive patients, Maastricht memory clinic without vascular MCI | 10        | 64  | SMC<br>aMCI            | Dementia                 | —                                                          | **UC | Education (years)                          | chi2<1.4, p>0.23                                        | n | y | y |
| Visser (54)     |                                                                         | 5         | 74  | SMC<br>aMCI            |                          |                                                            |      | Dementia (All AD)                          | **UC                                                    |   |   |   |
|                 |                                                                         |           |     | Depression (baseline)  | C/NC: 26% versus 50%, NS |                                                            |      |                                            |                                                         |   |   |   |
|                 |                                                                         |           |     | Depression (follow-up) | C/NC: 7% versus 29% NS   |                                                            |      |                                            |                                                         |   |   |   |
| Xu (40)         | Male patients from 2 Chinese neurology outpatient clinics               | 2         | 163 | SMC                    | Dementia                 | —                                                          | KM   | Heavy versus light to moderate alcohol use | P<0.05                                                  | n | y | y |
|                 |                                                                         |           |     | any                    |                          |                                                            |      | Heavy drinkers versus abstainers           | P<0.05                                                  |   |   |   |
| Yasar (33)      | Participants with MCI in USA RCT of Ginkgo Biloba                       | 6.1       | 320 | All                    | AD                       | age, sex, education, income, no. of vascular diseases, BMI | CPH  | Diuretic versus no antihypertensive use    | HR 0.38 (0.20–0.73) 0.004                               | n | y | y |
|                 |                                                                         |           |     |                        |                          |                                                            |      | Other cardiovascular drugs                 | Not significant predictors                              |   |   |   |
| Ye (71)         | Consecutive patients in 31 South Korea memory clinics                   | Mean 1.43 | 249 | aMCI<br>SMC            | AD                       | age, gender, and baseline MMSE                             | CPH  | Education (>8 years)                       | HR 2.18 (1.10–4.32); Late-stage: 2.38; p=0.03 Early: NS | n | y | y |
| Ye (66)         | People in National USA MRI study                                        | 4         | 319 | aMCI<br>SMC            | Probable AD              | —                                                          | **UC | Education (years)                          | C/NC: 15.77±2.90 versus 15.65±3.06, p=0.7               | n | y | y |

## References

1. Petersen RC: Mild cognitive impairment as a diagnostic entity. *J Intern Med* 2004; 256:183–194
2. Albert MS, DeKosky ST, Dickson D et al: The diagnosis of mild cognitive impairment due to Alzheimer's disease: recommendations from the National Institute on Aging-Alzheimer's Association workgroups on diagnostic guidelines for Alzheimer's disease. *Alzheimers Dement* 2011; 7:270–279
3. Lopez OL, Kuller LH, Becker JT et al: Incidence of dementia in mild cognitive impairment in the cardiovascular health study cognition study. *Arch Neurol* 2007; 64:416–420
4. Tschanz JT, Welsh-Bohmer KA, Lyketsos CG et al: Cache County Investigators: Conversion to dementia from mild cognitive disorder: the Cache County Study. *Neurology* 2006; 67:229–234
5. National Institute for Clinical Excellence (NICE): Dementia: A NICE-SCIE Guideline on Supporting People With Dementia and Their Carers in Health and Social Care: NICE Clinical Guidelines, No 42. Leicester, UK, British Psychological Society, 2007
6. Cooper C, Li R, Lyketsos C et al: Treatment for mild cognitive impairment: systematic review. *Br J Psychiatry* 2013; 203:255–264
7. Ritchie K, Carrière I, Ritchie CW et al: Designing prevention programmes to reduce incidence of dementia: prospective cohort study of modifiable risk factors. *BMJ* 2010; 341:c3885
8. Solfrizzi V, Panza F, Frisardi V et al: Diet and Alzheimer's disease risk factors or prevention: the current evidence. *Expert Rev Neurother* 2011; 11:677–708
9. Cheng G, Huang C, Deng H et al: Diabetes as a risk factor for dementia and mild cognitive impairment: a meta-analysis of longitudinal studies. *Intern Med J* 2012; 42:484–491
10. Larson EB, Wang L, Bowen JD et al: Exercise is associated with reduced risk for incident dementia among persons 65 years of age and older. *Ann Intern Med* 2006; 144:73–81
11. Beydoun MA, Beason-Held LL, Kitner-Triolo MH et al: Statins and serum cholesterol's associations with incident dementia and mild cognitive impairment. *J Epidemiol Community Health* 2011; 65:949–957
12. Holwerda TJ, Deeg DJ, Beekman AT et al: Feelings of loneliness, but not social isolation, predict dementia onset: results from the Amsterdam Study of the Elderly (AMSTEL). *J Neurol Neurosurg Psychiatry* 2014; 85:135–142
13. Barnes DE, Haight TJ, Mehta KM et al: Secondhand smoke, vascular disease, and dementia incidence: findings from the cardiovascular health cognition study. *Am J Epidemiol* 2010; 171:292–302
14. Beydoun MA, Beydoun HA, Gamaldo AA et al: Epidemiologic studies of modifiable factors associated with cognition and dementia: systematic review and meta-analysis. *BMC Public Health* 2014; 14:643
15. Geda YE, Roberts RO, Mielke MM et al: Baseline neuropsychiatric symptoms and the risk of incident mild cognitive impairment: a population-based study. *Am J Psychiatry* 2014; 171:572–581
16. Di Marco LY, Marzo A, Muñoz-Ruiz M et al: Modifiable lifestyle factors in dementia: a systematic review of longitudinal observational cohort studies. *J Alzheimers Dis* 2014; 42:119–135
17. Biessels GJ, Staekenborg S, Brunner E et al: Risk of dementia in diabetes mellitus: a systematic review. *Lancet Neurol* 2006; 5:64–74



18. Li J, Wang YJ, Zhang M et al: Chongqing Ageing Study Group: Vascular risk factors promote conversion from mild cognitive impairment to Alzheimer disease. *Neurology* 2011; 76:1485–1491
19. Li L, Wang Y, Yan J et al: Chongqing Aging Study Group: Clinical predictors of cognitive decline in patients with mild cognitive impairment: the Chongqing aging study. *J Neurol* 2012; 259:1303–1311
20. Prasad K, Wiryasaputra L, Ng A et al: White matter disease independently predicts progression from mild cognitive impairment to Alzheimer's disease in a clinic cohort. *Dement Geriatr Cogn Disord* 2011; 31:431–434
21. Morris JK, Vidoni ED, Honea RA et al: Alzheimer's Disease Neuroimaging Initiative: Impaired glycemia increases disease progression in mild cognitive impairment. *Neurobiol Aging* 2014; 35:585–589
22. Xu W, Caracciolo B, Wang HX et al: Accelerated progression from mild cognitive impairment to dementia in people with diabetes. *Diabetes* 2010; 59:2928–2935
23. Velayudhan L, Poppe M, Archer N et al: Risk of developing dementia in people with diabetes and mild cognitive impairment. *Br J Psychiatry* 2010; 196:36–40
24. Solfrizzi V, Panza F, Colacicco AM et al: Italian Longitudinal Study on Aging Working Group: Vascular risk factors, incidence of MCI, and rates of progression to dementia. *Neurology* 2004; 63:1882–1891
25. Luck T, Riedel-Heller SG, Lupp M et al: A hierarchy of predictors for dementia-free survival in old-age: results of the AgeCoDe study. *Acta Psychiatr Scand* 2014; 129:63–72
26. Artero S, Ancelin ML, Portet F et al: Risk profiles for mild cognitive impairment and progression to dementia are gender specific. *J Neurol Neurosurg Psychiatry* 2008; 79:979–984
27. Ravaglia G, Forti P, Maioli F et al: Conversion of mild cognitive impairment to dementia: predictive role of mild cognitive impairment subtypes and vascular risk factors. *Dement Geriatr Cogn Disord* 2006; 21:51–58
28. Jack CR Jr, Petersen RC, Xu YC et al: Prediction of AD with MRI-based hippocampal volume in mild cognitive impairment. *Neurology* 1999; 52:1397–1403
29. Abner EL, Kryscio RJ, Cooper GE, Fardo DW, Jicha GA, Mendiondo MS et al. Mild cognitive impairment: statistical models of transition using longitudinal clinical data. *Int J Alzheimers Dis* 2012; 2012:291920.
30. Oveisgharan S, Hachinski V: Hypertension, executive dysfunction, and progression to dementia: the canadian study of health and aging. *Arch Neurol* 2010; 67:187–192
31. Korf ES, Wahlund LO, Visser PJ et al: Medial temporal lobe atrophy on MRI predicts dementia in patients with mild cognitive impairment. *Neurology* 2004; 63:94–100
32. Hansson O, Zetterberg H, Buchhave P et al: Association between CSF biomarkers and incipient Alzheimer's disease in patients with mild cognitive impairment: a follow-up study. *Lancet Neurol* 2006; 5:228–234
33. Yasar S, Xia J, Yao W et al: Ginkgo Evaluation of Memory (GEM) Study Investigators: Antihypertensive drugs decrease risk of Alzheimer disease: Ginkgo Evaluation of Memory Study. *Neurology* 2013; 81:896–903
34. Maioli F, Coveri M, Pagni P et al: Conversion of mild cognitive impairment to dementia in elderly subjects: a preliminary study in a memory and cognitive disorder unit. *Arch Gerontol Geriatr* 2007; 44(Suppl 1):233–241

35. Mackin RS, Insel P, Aisen PS et al: Alzheimer's Disease Neuroimaging Initiative: Longitudinal stability of subsyndromal symptoms of depression in individuals with mild cognitive impairment: relationship to conversion to dementia after 3 years. *Int J Geriatr Psychiatry* 2012; 27:355–363
36. Kryscio RJ, Abner EL, Lin Y et al: Adjusting for mortality when identifying risk factors for transitions to mild cognitive impairment and dementia. *J Alzheimers Dis* 2013; 35:823–832
37. Abner EL, Nelson PT, Schmitt FA et al: Self-reported head injury and risk of late-life impairment and AD pathology in an AD center cohort. *Dement Geriatr Cogn Disord* 2014; 37:294–306
38. Fellows L, Bergman H, Wolfson C et al: Can clinical data predict progression to dementia in amnesic mild cognitive impairment? *Can J Neurol Sci* 2008; 35:314–322
39. Solfrizzi V, D'Introno A, Colacicco AM et al: Italian Longitudinal Study on Aging Working Group: Alcohol consumption, mild cognitive impairment, and progression to dementia. *Neurology* 2007; 68:1790–1799
40. Xu G, Liu X, Yin Q et al: Alcohol consumption and transition of mild cognitive impairment to dementia. *Psychiatry Clin Neurosci* 2009; 63:43–49
41. Solfrizzi V, Scafato E, Capurso C et al: Italian Longitudinal Study on Aging Working Group: Metabolic syndrome, mild cognitive impairment, and progression to dementia. *Neurobiol Aging* 2011; 32:1932–1941
42. Brodaty H, Connors MH, Ames D et al: PRIME study group: Progression from mild cognitive impairment to dementia: A 3-year longitudinal study. *Aust N Z J Psychiatry* 2014; 48:1137–1142
43. Hsiung GY, Alipour S, Jacova C et al: Transition from cognitively impaired not demented to Alzheimer's disease: an analysis of changes in functional abilities in a dementia clinic cohort. *Dement Geriatr Cogn Disord* 2008; 25:483–490
44. Rozzini L, Chilovi BV, Conti M et al: Conversion of amnesic Mild Cognitive Impairment to dementia of Alzheimer type is independent to memory deterioration. *Int J Geriatr Psychiatry* 2007; 22:1217–1222
45. Beaudreau SA, Kaci Fairchild J, Spira AP et al: Neuropsychiatric symptoms, apolipoprotein E gene, and risk of progression to cognitive impairment, no dementia and dementia: the Aging, Demographics, and Memory Study (ADAMS). *Int J Geriatr Psychiatry* 2013; 28:672–680
46. Teng E, Lu PH, Cummings JL: Neuropsychiatric symptoms are associated with progression from mild cognitive impairment to Alzheimer's disease. *Dement Geriatr Cogn Disord* 2007; 24:253–259
47. Brodaty H, Heffernan M, Draper B et al: Neuropsychiatric symptoms in older people with and without cognitive impairment. *J Alzheimers Dis* 2012; 31:411–420
48. Taragano FE, Allegri RF, Krupitzki H et al: Mild behavioral impairment and risk of dementia: a prospective cohort study of 358 patients. *J Clin Psychiatry* 2009; 70:584–592
49. Edwards ER, Spira AP, Barnes DE et al: Neuropsychiatric symptoms in mild cognitive impairment: differences by subtype and progression to dementia. *Int J Geriatr Psychiatry* 2009; 24:716–722
50. Rosenberg PB, Mielke MM, Appleby BS et al: The association of neuropsychiatric symptoms in MCI with incident dementia and Alzheimer disease. *Am J Geriatr Psychiatry* 2013; 21:685–695
51. Modrego PJ, Ferrández J: Depression in patients with mild cognitive impairment increases the risk of developing dementia of Alzheimer type: a prospective cohort study. *Arch Neurol* 2004; 61:1290–1293

52. Gabryelewicz T, Styczynska M, Luczywek E et al: The rate of conversion of mild cognitive impairment to dementia: predictive role of depression. *Int J Geriatr Psychiatry* 2007; 22:563–567
53. Devier DJ, Pelton GH, Tabert MH et al: The impact of anxiety on conversion from mild cognitive impairment to Alzheimer's disease. *Int J Geriatr Psychiatry* 2009; 24:1335–1342
54. Visser PJ, Verhey FR, Ponds RW et al: Course of objective memory impairment in non-demented subjects attending a memory clinic and predictors of outcome. *Int J Geriatr Psychiatry* 2000; 15:363–372
55. Richard E, Schmand B, Eikelenboom P et al: Alzheimer's Disease Neuroimaging Initiative: Symptoms of apathy are associated with progression from mild cognitive impairment to Alzheimer's disease in non-depressed subjects. *Dement Geriatr Cogn Disord* 2012; 33:204–209
56. Palmer K, Di Iulio F, Varsi AE et al: Neuropsychiatric predictors of progression from amnesic-mild cognitive impairment to Alzheimer's disease: the role of depression and apathy. *J Alzheimers Dis* 2010; 20:175–183
57. Robert PH, Berr C, Volteau M et al: PrÉAL study: Apathy in patients with mild cognitive impairment and the risk of developing dementia of Alzheimer's disease: a one-year follow-up study. *Clin Neurol Neurosurg* 2006; 108:733–736
58. Vicini-Chilovi B, Riva M, Conti MZ et al: Differential impact of apathy and depression in the development of dementia in mild cognitive impairment patients. *Dement Geriatr Cogn Disord* 2010; 30:212–218
59. Chan WC, Lam LC, Tam CW et al: Neuropsychiatric symptoms are associated with increased risks of progression to dementia: a 2-year prospective study of 321 Chinese older persons with mild cognitive impairment. *Age Ageing* 2011; 40:30–35
60. Palmer K, Berger AK, Monastero R et al: Predictors of progression from mild cognitive impairment to Alzheimer disease. *Neurology* 2007; 68:1596–1602
61. Scarmeas N, Stern Y, Mayeux R et al: Mediterranean diet and mild cognitive impairment. *Arch Neurol* 2009; 66:216–225
62. Blasko I, Hinterberger M, Kemmler G et al: Conversion from mild cognitive impairment to dementia: influence of folic acid and vitamin B12 use in the VITA cohort. *J Nutr Health Aging* 2012; 16:687–694
63. Siuda J, Gorzkowska A, Patalong-Ogiewa M et al: From mild cognitive impairment to Alzheimer's disease - influence of homocysteine, vitamin B12 and folate on cognition over time: results from one-year follow-up. *Neurol Neurochir Pol* 2009; 43:321–329
64. Gavrilova SI, Fedorova YB, Roshchina IF et al: Prognosis of mild cognitive impairment syndrome: data from a two-year clinical follow-up study. *Neurosci Behav Physiol* 2008; 38:129–134
65. Squitti R, Ghidoni R, Siotto M et al: Value of serum nonceruloplasmin copper for prediction of mild cognitive impairment conversion to Alzheimer disease. *Ann Neurol* 2014; 75:574–580
66. Ye J, Farnum M, Yang E et al: Alzheimer's Disease Neuroimaging Initiative: Sparse learning and stability selection for predicting MCI to AD conversion using baseline ADNI data. *BMC Neurol* 2012; 12:46
67. Devanand DP, Pradhaban G, Liu X et al: Hippocampal and entorhinal atrophy in mild cognitive impairment: prediction of Alzheimer disease. *Neurology* 2007; 68:828–836

68. Alegret M, Cuberas-Borrós G, Espinosa A et al: Cognitive, genetic, and brain perfusion factors associated with four year incidence of Alzheimer's disease from mild cognitive impairment. *J Alzheimers Dis* 2014; 41:739–748
69. Barabash A, Marcos A, Ancín I et al: APOE, ACT and CHRNA7 genes in the conversion from amnesic mild cognitive impairment to Alzheimer's disease. *Neurobiol Aging* 2009; 30:1254–1264
70. Amieva H, Letenneur L, Dartigues JF et al: Annual rate and predictors of conversion to dementia in subjects presenting mild cognitive impairment criteria defined according to a population-based study. *Dement Geriatr Cogn Disord* 2004; 18:87–93
71. Ye BS, Seo SW, Cho H et al: Effects of education on the progression of early- versus late-stage mild cognitive impairment. *Int Psychogeriatr* 2013; 25:597–606
72. St John P, Montgomery P: Does self-rated health predict dementia? *J Geriatr Psychiatry Neurol* 2013; 26:41–50
73. Han JW, Kim TH, Lee SB et al: Predictive validity and diagnostic stability of mild cognitive impairment subtypes. *Alzheimers Dement* 2012; 8:553–559
74. Farias ST, Mungas D, Reed BR et al: Progression of mild cognitive impairment to dementia in clinic- vs community-based cohorts. *Arch Neurol* 2009; 66:1151–1157
75. Kryscio RJ, Schmitt FA, Salazar JC et al: Risk factors for transitions from normal to mild cognitive impairment and dementia. *Neurology* 2006; 66:828–832
76. Aretouli E, Okonkwo OC, Samek J et al: The fate of the 0.5s: predictors of 2-year outcome in mild cognitive impairment. *J Int Neuropsychol Soc* 2011; 17:277–288
77. Olazarán J, Torrero P, Cruz I et al: Mild cognitive impairment and dementia in primary care: the value of medical history. *Fam Pract* 2011; 28:385–392
78. Peltz CB, Corrada MM, Berlau DJ et al: Incidence of dementia in oldest-old with amnesic MCI and other cognitive impairments. *Neurology* 2011; 77:1906–1912
79. Sachdev PS, Chen X, Brodaty H et al: The determinants and longitudinal course of post-stroke mild cognitive impairment. *J Int Neuropsychol Soc* 2009; 15:915–923
80. Meyer J, Xu G, Thornby J et al: Longitudinal analysis of abnormal domains comprising mild cognitive impairment (MCI) during aging. *J Neurol Sci* 2002; 201:19–25
81. Lee YM, Park JM, Lee BD et al: Memory impairment, in mild cognitive impairment without significant cerebrovascular disease, predicts progression to Alzheimer's disease. *Dement Geriatr Cogn Disord* 2012; 33:240–244
82. Grande G, Vanacore N, Maggiore L et al: Physical activity reduces the risk of dementia in mild cognitive impairment subjects: a cohort study. *J Alzheimers Dis* 2014; 39:833–839
83. Forti P, Maioli F, Pisacane N et al: Atrial fibrillation and risk of dementia in non-demented elderly subjects with and without mild cognitive impairment. *Neurol Res* 2006; 28:625–629
84. Schneider LS, Insel PS, Weiner MW; Alzheimer's Disease Neuroimaging Initiative: Treatment with cholinesterase inhibitors and memantine of patients in the Alzheimer's Disease Neuroimaging Initiative. *Arch Neurol* 2011; 68:58–66

85. Luchsinger JA, Tang MX, Shea S et al: Hyperinsulinemia and risk of Alzheimer disease. *Neurology* 2004; 63:1187–1192
86. Frölich L, Blum-Degen D, Bernstein HG et al: Brain insulin and insulin receptors in aging and sporadic Alzheimer's disease. *J Neural Transm* 1998; 105:423–438
87. Barnard ND, Bunner AE, Agarwal U: Saturated and trans fats and dementia: a systematic review. *Neurobiol Aging* 2014; 35(Suppl 2):S65–S73
88. Loef M, Walach H: Fruit, vegetables and prevention of cognitive decline or dementia: a systematic review of cohort studies. *J Nutr Health Aging* 2012; 16:626–630
89. Lourida I, Soni M, Thompson-Coon J et al: Mediterranean diet, cognitive function, and dementia: a systematic review. *Epidemiology* 2013; 24:479–489
90. Sharp SI, Aarsland D, Day S et al: Alzheimer's Society Vascular Dementia Systematic Review Group: Hypertension is a potential risk factor for vascular dementia: systematic review. *Int J Geriatr Psychiatry* 2011; 26:661–669
91. Anstey KJ, Lipnicki DM, Low LF: Cholesterol as a risk factor for dementia and cognitive decline: a systematic review of prospective studies with meta-analysis. *Am J Geriatr Psychiatry* 2008; 16:343–354
92. Apostolova LG, Cummings JL: Neuropsychiatric manifestations in mild cognitive impairment: a systematic review of the literature. *Dement Geriatr Cogn Disord* 2008; 25:115–126
93. Geda YE, Schneider LS, Gitlin LN et al: Neuropsychiatric Syndromes Professional Interest Area of ISTAART: Neuropsychiatric symptoms in Alzheimer's disease: past progress and anticipation of the future. *Alzheimers Dement* 2013; 9:602–608
94. Tighe SK, Oishi K, Mori S et al: Diffusion tensor imaging of neuropsychiatric symptoms in mild cognitive impairment and Alzheimer's dementia. *J Neuropsychiatry Clin Neurosci* 2012; 24:484–488
95. Smith GS, Kramer E, Ma Y et al: Cholinergic modulation of the cerebral metabolic response to citalopram in Alzheimer's disease. *Brain* 2009; 132:392–401
96. Mowla A, Mosavinasab M, Pani A: Does fluoxetine have any effect on the cognition of patients with mild cognitive impairment? A double-blind, placebo-controlled, clinical trial. *J Clin Psychopharmacol* 2007; 27:67–70
97. da Silva J, Gonçalves-Pereira M, Xavier M et al: da SJ: Affective disorders and risk of developing dementia: systematic review. *Br J Psychiatry* 2013; 202:177–186
98. Paradise M, Cooper C, Livingston G: Systematic review of the effect of education on survival in Alzheimer's disease. *Int Psychogeriatr* 2009; 21:25–32
99. Busse A, Angermeyer MC, Riedel-Heller SG: Progression of mild cognitive impairment to dementia: a challenge to current thinking. *Br J Psychiatry* 2006; 189:399–404
100. Hye A, Riddoch-Contreras J, Baird AL et al: Plasma proteins predict conversion to dementia from prodromal disease. *Alzheimers Dement* 2014; 10:799, e2
101. Schneider LS: The potential and limits for clinical trials for early Alzheimer's disease and some recommendations. *J Nutr Health Aging* 2010; 14:295–298

102. Richard E, Reitz C, Honig LH et al: Late-life depression, mild cognitive impairment, and dementia. *JAMA Neurol* 2013; 70:374–382
103. Panza F, Capurso C, D’Introno A et al: The Italian Longitudinal Study on Aging: Impact of depressive symptoms on the rate of progression to dementia in patients affected by mild cognitive impairment. *Int J Geriatr Psychiatry* 2008; 23:726–734
104. Caracciolo B, Bäckman L, Monastero R et al: The symptom of low mood in the prodromal stage of mild cognitive impairment and dementia: a cohort study of a community dwelling elderly population. *J Neurol Neurosurg Psychiatry* 2011; 82:788–793
105. Lopez OL, Kuller LH, Becker JT et al: Incidence of dementia in mild cognitive impairment in the cardiovascular health study cognition study. *Arch Neurol* 2007; 64:416–420
106. Bettermann K, Arnold AM, Williamson J et al: Statins, risk of dementia, and cognitive function: secondary analysis of the ginkgo evaluation of memory study. *J Stroke Cerebrovasc Dis* 2012; 21:436–444
107. Fleisher AS, Sowell BB, Taylor C et al: Alzheimer’s Disease Cooperative Study: Clinical predictors of progression to Alzheimer disease in amnesic mild cognitive impairment. *Neurology* 2007; 68:1588–1595
108. Hsiung GY, Sadvnick AD, Feldman H: Apolipoprotein E epsilon4 genotype as a risk factor for cognitive decline and dementia: data from the Canadian Study of Health and Aging. *CMAJ* 2004; 171:863–867
109. Luis CA, Barker WW, Loewenstein DA et al: Conversion to dementia among two groups with cognitive impairment. A preliminary report. *Dement Geriatr Cogn Disord* 2004; 18:307–313
110. Mauri M, Corbetta S, Pianezzola C et al: Progression to vascular dementia of patients with mild cognitive impairment: relevance of mild parkinsonian signs. *Neuropsychiatr Dis Treat* 2008; 4:1267–1271
111. Peavy GM, Jacobson MW, Salmon DP et al: The influence of chronic stress on dementia-related diagnostic change in older adults. *Alzheimer Dis Assoc Disord* 2012; 26:260–266
112. Perri R, Serra L, Carlesimo GA et al: Early Diagnosis Group of Italian Interdisciplinary Network on Alzheimer’s Disease: Preclinical dementia: an Italian multicentre study on amnesic mild cognitive impairment. *Dement Geriatr Cogn Disord* 2007; 23:289–300
113. Rozzini L, Vicini Chilovi B, Trabucchi M et al: Depression is unrelated to conversion to dementia in patients with mild cognitive impairment. *Arch Neurol* 2005; 62:505, author reply 505–506
114. Visser PJ, Kester A, Jolles J et al: Ten-year risk of dementia in subjects with mild cognitive impairment. *Neurology* 2006; 67:1201–1207
